# Supplementary material for: The adaptive designs CONSORT extension (ACE) statement: a checklist with explanation and elaboration guideline for reporting randomised trials that use an adaptive design
Source: PubMed Central journal article supplement (PMC7298968; doi:10.1186/s13063-020-04334-x), 2020-06-17
Supplement: 13063_2020_4334_MOESM8_ESM.pdf [file 13063_2020_4334_MOESM8_ESM.pdf]

## Appendix H: An example of a CONSORT flowchart for reporting a MAMS adaptive design

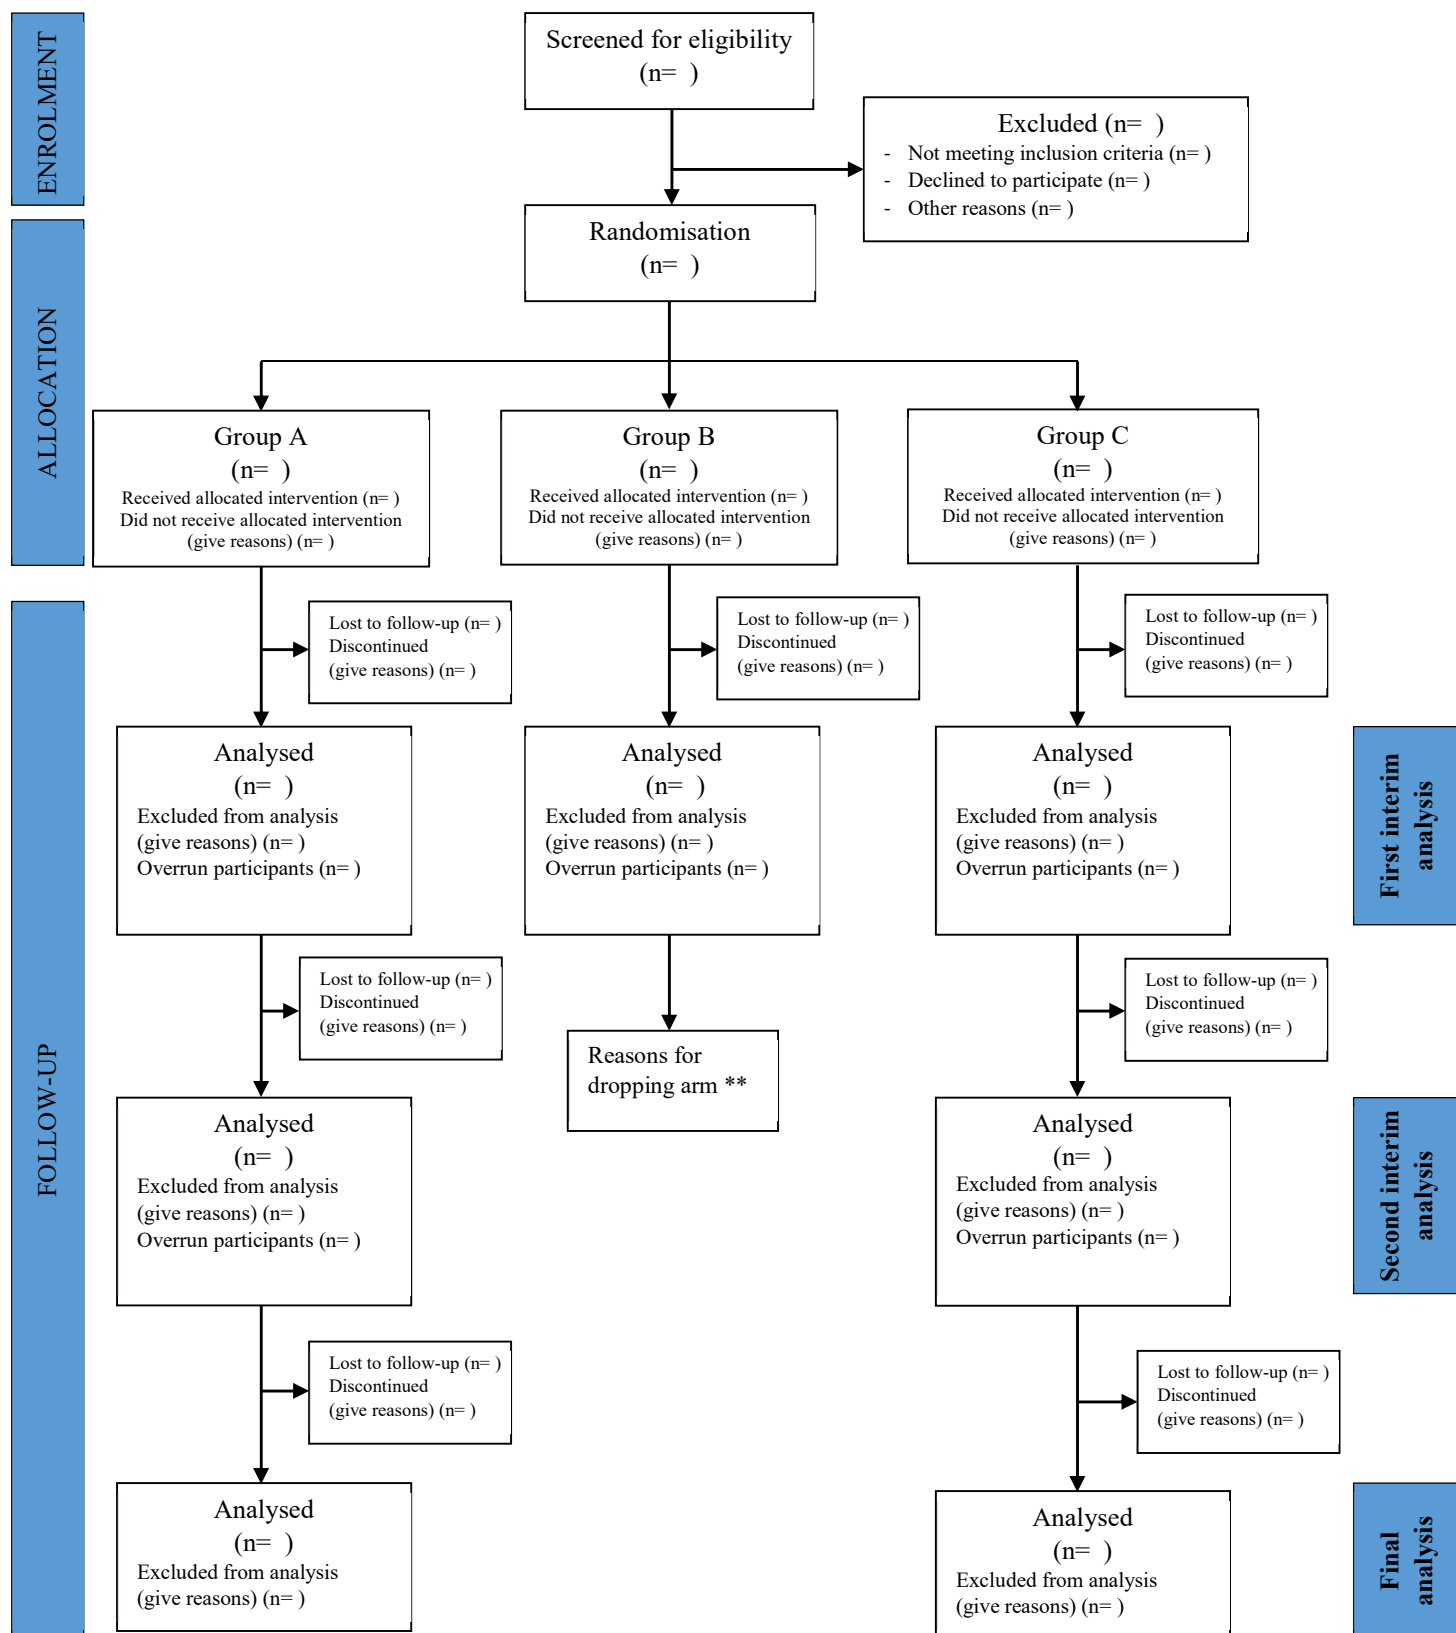

\*\* This can be extended to the final analysis if an additional analysis was performed after an interim analysis when a treatment arm was stopped (e.g. to include overrun participants who did not contribute to the interim analysis or long-term outcome data)
