# Supplementary material for: The adaptive designs CONSORT extension (ACE) statement: a checklist with explanation and elaboration guideline for reporting randomised trials that use an adaptive design
Source: PubMed Central journal article supplement (PMC7298968; doi:10.1186/s13063-020-04334-x), 2020-06-17
Supplement: 13063_2020_4334_MOESM9_ESM.pdf [file 13063_2020_4334_MOESM9_ESM.pdf]

## Appendix I: Box 22 - Dummy baseline table for the TAPPS trial

| Characteristic       | Full population (cutaneous and non-cutaneous) |                        | Subpopulation (cutaneous)   |                  |
|----------------------|-----------------------------------------------|------------------------|-----------------------------|------------------|
|                      | TRC105 and Pazopanib (n=xx)                   | Pazopanid alone (n=xx) | TRC105 and Pazopanib (n=xx) | Pazopanid (n=xx) |
| Age, years           |                                               |                        |                             |                  |
| Mean(SD)             | xx(xx.x)                                      | xx(xx.x)               | xx(xx.x)                    | xx(xx.x)         |
| Min, max             | xx, xx                                        | xx, xx                 | xx, xx                      | xx, xx           |
| Sex, n(%)            |                                               |                        |                             |                  |
| Female               | xx(xx%)                                       | xx(xx%)                | xx(xx%)                     | xx(xx%)          |
| Male                 | xx(xx%)                                       | xx(xx%)                | xx(xx%)                     | xx(xx%)          |
| Height, m            |                                               |                        |                             |                  |
| Mean(SD)             | xx(xx.x)                                      | xx(xx.x)               | xx(xx.x)                    | xx(xx.x)         |
| Min, max             | xx, xx                                        | xx, xx                 | xx, xx                      | xx, xx           |
| Weight, Kg           |                                               |                        |                             |                  |
| Mean(SD)             | xx(xx.x)                                      | xx(xx.x)               | xx(xxx)                     | xx(xxx)          |
| Min, max             | xx, xx                                        | xx, xx                 | xx, xx                      | xx, xx           |
| Plasma Levels:       |                                               |                        |                             |                  |
| VEGF <sup>1</sup>    |                                               |                        |                             |                  |
| Mean(SD)             | xx(xx.x)                                      | xx(xx.x)               | xx(xx.x)                    | xx(xx.x)         |
| Min, max             | xx, xx                                        | xx, xx                 | xx, xx                      | xx, xx           |
| sVEGFR2 <sup>2</sup> |                                               |                        |                             |                  |
| Mean(SD)             | xx(xx.x)                                      | xx(xx.x)               | xx(xx.x)                    | xx(xx.x)         |
| Min, max             | xx, xx                                        | xx, xx                 | xx, xx                      | xx, xx           |
| sCD105 <sup>3</sup>  |                                               |                        |                             |                  |
| Mean(SD)             | xx(xx.x)                                      | xx(xx.x)               | xx(xx.x)                    | xx(xx.x)         |
| Min, max             | xx, xx                                        | xx, xx                 | xx, xx                      | xx, xx           |
| PIGF <sup>4</sup>    |                                               |                        |                             |                  |
| Mean(SD)             | xx(xx.x)                                      | xx(xx.x)               | xx(xx.x)                    | xx(xx.x)         |
| Min, max             | xx, xx                                        | xx, xx                 | xx, xx                      | xx, xx           |
| CTCs <sup>5</sup>    |                                               |                        |                             |                  |
| Mean(SD)             | xx(xx.x)                                      | xx(xx.x)               | xx(xx.x)                    | xx(xx.x)         |
| Min, max             | xx, xx                                        | xx, xx                 | xx, xx                      | xx, xx           |

<sup>1</sup> vascular endothelial growth factor; <sup>2</sup> soluble vascular endothelial growth receptor; <sup>3</sup> soluble endoglin; <sup>4</sup> placental growth factor; <sup>5</sup> numbers of endoglin expressing circulating tumor cells; min, minimum; max, maximum; SD, standard deviation, Kg, kilograms; m, metres
